# Supplementary material
Source: ML conference proceedings conference paper supplement (https://proceedings.neurips.cc/paper_files/paper/2017/hash/b7fede84c2be02ccb9c77107956560eb-Abstract.html)
Supplement: Supplementary file [file b7fede84c2be02ccb9c77107956560eb-Supplemental.zip]

## A Appendix

The appendix is devoted to proofs of various results from the main text.

### A.1 Proof of Lemma 1

Suppose there exist two distributions  $P, Q$  on  $\mathbb{R}^m$  such that  $\mathbb{E}_{P(X)}[\tilde{k}(y, X)] = \mathbb{E}_{Q(X)}[\tilde{k}_1(y, X)]$  for any  $y \in \mathbb{R}^m$ . Consider  $\mathbb{R}^m$  as a subspace embedded in  $\mathbb{R}^d$ . The probability distributions  $P$  and  $Q$  can be extended to  $\mathbb{R}^d$  by setting the remaining components to zero. Then we also have  $\mathbb{E}_{P(X)}[\tilde{k}_1(y, X)] = \mathbb{E}_{Q(X)}[\tilde{k}_1(y, X)]$  for any  $y \in \mathbb{R}^d$ . As  $k_1$  is characteristic,  $P = Q$ .

### A.2 Proof of Theorem 2 and Corollary 3

Theorem 2 and Corollary 3 can be proved simultaneously. The proof of Theorem 2 parallels the proof of the corresponding theorem in the setting of dimension reduction by Fukumizu et al. [10].

We can interpret  $\tilde{\mathbb{H}}_1$  as a subset of  $\mathbb{H}_1$ , so Equation 7 implies  $\Sigma_{YY|X_{\mathcal{T}}} \geq \Sigma_{YY|X}$ . In the univariate case, this is equivalent to saying  $\text{trace}[\Sigma_{YY|X_{\mathcal{T}}}] \geq \text{trace}[\Sigma_{YY|X}]$ .

By the law of total variance, we have for any  $g \in \mathbb{H}_2$ ,

$$\mathbb{E}_{X_{\mathcal{T}}} \text{var}_{Y|X_{\mathcal{T}}}[g(Y)|X_{\mathcal{T}}] = \mathbb{E}_X[\text{var}[g(Y)|X]] + \mathbb{E}_{X_{\mathcal{T}}} \text{var}_{Y|X_{\mathcal{T}}}[\mathbb{E}_{Y|X}[g(Y)|X]]. \quad (21)$$

By Lemma 1, the kernel  $\tilde{k}_1$  is characteristic, so the conditional covariance operator characterizes the conditional dependence, which reduces Equation 21 to

$$\langle g, (\Sigma_{YY|X_{\mathcal{T}}} - \Sigma_{YY|X})g \rangle = \mathbb{E}_{X_{\mathcal{T}}} \text{var}_{Y|X_{\mathcal{T}}}[\mathbb{E}_{Y|X}[g(Y)|X]]. \quad (22)$$

Hence  $\Sigma_{YY|X_{\mathcal{T}}} = \Sigma_{YY|X}$  if and only if given  $X_{\mathcal{T}}$ ,  $\mathbb{E}_{Y|X}[g(Y)|X]$  is almost surely determined. Because  $k_2$  is characteristic, we have  $Y \perp\!\!\!\perp X|X_{\mathcal{T}}$ . Suppose  $Y$  is univariate and  $k_2$  is the linear kernel. Then both  $\Sigma_{YY|X}$  and  $\Sigma_{YY|X_{\mathcal{T}}}$  can be equivalently interpreted as linear functions that map real numbers to real numbers. When  $g = \text{Id}_Y$ , the identity function on  $Y$ , we have

$$\langle \text{Id}_Y, (\Sigma_{YY|X_{\mathcal{T}}} - \Sigma_{YY|X})\text{Id}_Y \rangle = \mathbb{E}_{X_{\mathcal{T}}} \text{var}_{Y|X_{\mathcal{T}}}[\mathbb{E}_{Y|X}[Y|X]] = 0. \quad (23)$$

This implies  $Y \perp\!\!\!\perp X|X_{\mathcal{T}}$  directly.

### A.3 Proof of Theorem 5

We provide a simpler proof than the one for Theorem 6 in the paper [10], where the consistency result for dimension reduction was established.

For any subset of features  $\mathcal{T}$ , we have

$$\begin{aligned} & |\text{trace}[\hat{\Sigma}_{YY|X_{\mathcal{T}}}] - \text{trace}[\Sigma_{YY|X_{\mathcal{T}}}]| \\ & \leq |\text{trace}[\Sigma_{YY|X_{\mathcal{T}}}] - \text{trace}[\Sigma_{YY} - \Sigma_{YX_{\mathcal{T}}}(\Sigma_{X_{\mathcal{T}}X_{\mathcal{T}}} + \varepsilon_n I)^{-1}\Sigma_{X_{\mathcal{T}}Y}]| + \\ & \quad + |\text{trace}[\Sigma_{YY} - \Sigma_{YX_{\mathcal{T}}}(\Sigma_{X_{\mathcal{T}}X_{\mathcal{T}}} + \varepsilon_n I)^{-1}\Sigma_{X_{\mathcal{T}}Y}] - \text{trace}[\hat{\Sigma}_{YY|X_{\mathcal{T}}}]|, \end{aligned}$$

where the second term converges to zero by the law of large numbers, whereas Fukumizu et al. [10] proved that the second term can be upper bounded as

$$\begin{aligned} & \frac{1}{\varepsilon_n} \{ (\|\hat{\Sigma}_{YX_{\mathcal{T}}}^{(n)}\|_{\text{HS}} + \|\Sigma_{YX_{\mathcal{T}}}\|_{\text{HS}}) \|\hat{\Sigma}_{YX_{\mathcal{T}}} - \Sigma_{YX_{\mathcal{T}}}\|_{\text{HS}} \\ & \quad + \|\Sigma_{YY}\|_{\text{trace}} \|\hat{\Sigma}_{X_{\mathcal{T}}X_{\mathcal{T}}}^{(n)} - \Sigma_{X_{\mathcal{T}}X_{\mathcal{T}}}\|_{\text{HS}} \\ & \quad + |\text{trace}[\hat{\Sigma}_{YY} - \Sigma_{YY}]| \}, \end{aligned}$$

where  $\|\cdot\|_{\text{HS}}$  is the HSIC norm of an operator. By the Central Limit Theorem, both of the terms

$$\|\hat{\Sigma}_{YX_{\mathcal{T}}} - \Sigma_{YX_{\mathcal{T}}}\|_{\text{HS}}, \|\hat{\Sigma}_{X_{\mathcal{T}}X_{\mathcal{T}}}^{(n)} - \Sigma_{X_{\mathcal{T}}X_{\mathcal{T}}}\|_{\text{HS}} \quad \text{and} \quad |\text{trace}[\hat{\Sigma}_{YY} - \Sigma_{YY}]|$$

are guaranteed to be of order  $\mathcal{O}_p(n^{-1/2})$ . Hence, the second term also converges to 0. This establishes the convergence of  $\text{trace}[\hat{\Sigma}_{YY|X_{\mathcal{T}}}]$  towards  $\text{trace}[\Sigma_{YY|X_{\mathcal{T}}}]$ , which yields the claim (15) by standard  $\varepsilon$ - $\delta$  arguments.
